# Supplementary material for: Influence of Germline Genetics on Tacrolimus Pharmacokinetics and Pharmacodynamics in Allogeneic Hematopoietic Stem Cell Transplant Patients
Source: Int J Mol Sci. 2020 Jan 29;21(3):858. doi: 10.3390/ijms21030858 (PMC7037631; doi:10.3390/ijms21030858)
Supplement: Supplementary file 1 [file ijms-21-00858-s001.pdf]

## Supplementary Tables

**Table S1.** Preliminary results for association between DDIs and CYP3A4/5 and ABCB1 SNPs. The presence of one or more DDIs were categorized as one group and associations were examined for each SNP.  $p < 0.05$  was considered significant.

| SNP                               | Genotype                           | DDI, <i>n</i> | DDI, % | Unadjusted <i>p</i> -value | Adjusted <i>p</i> -value |
|-----------------------------------|------------------------------------|---------------|--------|----------------------------|--------------------------|
| CYP3A5*3<br>( <i>n</i> = 252)     | *1/*1 ( <i>n</i> = 13)             | 10            | 76.9   | 0.09                       | 0.54                     |
|                                   | *1/*3 ( <i>n</i> = 64)             | 60            | 93.8   |                            |                          |
|                                   | *3/*3 ( <i>n</i> = 175)            | 163           | 93.1   |                            |                          |
| CYP3A4*1b<br>( <i>n</i> = 247)    | *1/*1 ( <i>n</i> = 200)            | 189           | 94.5   | 0.08                       | 0.48                     |
|                                   | *1/*1b ( <i>n</i> = 33)            | 28            | 84.9   |                            |                          |
|                                   | *1b/*1b ( <i>n</i> = 14)           | 12            | 85.7   |                            |                          |
| CYP3A4*22<br>( <i>n</i> = 252)    | *1/*1 ( <i>n</i> = 241)            | 222           | 92.1   | 0.36                       | > 0.99                   |
|                                   | *1/*22 or *22/*22 ( <i>n</i> = 11) | 10            | 90.9   |                            |                          |
| ABCB1 C1236T<br>( <i>n</i> = 224) | CC ( <i>n</i> = 73)                | 72            | 98.6   | 0.10                       | 0.60                     |
|                                   | CT ( <i>n</i> = 116)               | 103           | 88.8   |                            |                          |
|                                   | TT ( <i>n</i> = 35)                | 31            | 88.6   |                            |                          |
| ABCB1 C2677T<br>( <i>n</i> = 187) | CC ( <i>n</i> = 82)                | 80            | 97.6   | 0.48                       | >0.99                    |
|                                   | CT ( <i>n</i> = 71)                | 66            | 93.0   |                            |                          |
|                                   | TT ( <i>n</i> = 34)                | 31            | 91.2   |                            |                          |
| ABCB1 C3435T<br>( <i>n</i> = 222) | CC ( <i>n</i> = 56)                | 55            | 98.2   | 0.11                       | 0.66                     |
|                                   | CT ( <i>n</i> = 116)               | 104           | 89.7   |                            |                          |
|                                   | TT ( <i>n</i> = 50)                | 46            | 92.0   |                            |                          |

Abbreviations: ABCB1, ATP-binding cassette B1; CYP3A4/5, cytochrome P450 isoforms 4 and 5; DDI, drug-drug interactions.

**Table S2.** HWE for *CYP3A5\*3*, *CYP3A4\*1b* and *ABCB1* SNPs. For *CYP3A5\*3*, successful genotyping calls were obtained for all 252 patients, but for *CYP3A4\*1b* there was only sufficient quantity of high-quality DNA to genotype 247 patients. Similarly, for *ABCB1*, only 224, 187, and 222 patients were genotyped for SNPs located at the C1236T, C2677T and C3435T loci, respectively. Based on predicted MAF differences among black and non-black patients for *CYP3A5\*3* and *CYP3A4\*1b*, subgroup analyses were performed. For the subgroup HWE analyses that were stratified by race, there were a total of 30 black patients and 222 non-black patients for *CYP3A5\*3*, while there were a total of 29 black patients and 218 non-black patients for *CYP3A4\*1b*. HWE calculations were not performed for *CYP3A4\*22* because the predicted MAF was  $\leq 5\%$  among all races. SNP genotype calls were considered inconsistent with HWE only when  $p < 1 \times 10^{-3}$ .

|                                                     | Observed Values | Expected Values | $\chi^2$ | $p$ -value |
|-----------------------------------------------------|-----------------|-----------------|----------|------------|
| HWE analysis among all patients ( $n = 252$ )       |                 |                 |          |            |
| CYP3A5*3 ( $n = 252$ )                              |                 |                 |          |            |
| *1/*1                                               | 13              | 8               | 4.55     | 0.03       |
| *1/*3                                               | 64              | 74              |          |            |
| *3/*3                                               | 175             | 170             |          |            |
| CYP3A4*1b ( $n = 247$ )                             |                 |                 |          |            |
| *1/*1                                               | 200             | 190             | 36.20    | < 0.001    |
| *1/*1b                                              | 33              | 54              |          |            |
| *1b/*1b                                             | 14              | 4               |          |            |
| ABCB1 C1236T ( $n = 224$ )                          |                 |                 |          |            |
| C/C                                                 | 73              | 77              | 0.99     | 0.32       |
| C/T                                                 | 116             | 109             |          |            |
| T/T                                                 | 35              | 39              |          |            |
| ABCB1 C2677T ( $n = 187$ )                          |                 |                 |          |            |
| C/C                                                 | 82              | 74              | 6.54     | 0.01       |
| C/T                                                 | 71              | 87              |          |            |
| T/T                                                 | 34              | 26              |          |            |
| ABCB1 C3435T ( $n = 222$ )                          |                 |                 |          |            |
| C/C                                                 | 56              | 59              | 0.47     | 0.49       |
| C/T                                                 | 116             | 111             |          |            |
| T/T                                                 | 50              | 53              |          |            |
| HWE analysis among Black patients only ( $n = 30$ ) |                 |                 |          |            |
| CYP3A5*3 ( $n = 30$ )                               |                 |                 |          |            |
| *1/*1                                               | 7               | 9               | 2.34     | 0.13       |
| *1/*3                                               | 19              | 15              |          |            |
| *3/*3                                               | 4               | 6               |          |            |
| CYP3A4*1b ( $n = 29$ )                              |                 |                 |          |            |
| *1/*1                                               | 4               | 3               | 0.21     | 0.65       |
| *1/*1b                                              | 12              | 13              |          |            |
| *1b/*1b                                             | 13              | 12              |          |            |
| HWE analysis among non-Black patients ( $n = 222$ ) |                 |                 |          |            |
| CYP3A5*3 ( $n = 222$ )                              |                 |                 |          |            |
| *1/*1                                               | 6               | 4               | 1.97     | 0.16       |
| *1/*3                                               | 45              | 50              |          |            |
| *3/*3                                               | 171             | 169             |          |            |
| CYP3A4*1b ( $n = 218$ )                             |                 |                 |          |            |
| *1/*1                                               | 196             | 196             | 0.28     | 0.59       |
| *1/*1b                                              | 21              | 22              |          |            |
| *1b/*1b                                             | 1               | 1               |          |            |

Abbreviations: *ABCB1*, ATP-binding cassette B1; Adj, adjusted; *CYP3A4/5*, cytochrome P450 isoforms 4 and 5; HWE, Hardy-Weinberg equilibrium; MAF, minor allele frequency; SNP, single nucleotide polymorphisms.

**Table S3.** Predicted and observed minor allele frequency for *CYP3A4/5* and *ABCB1* SNPs. Predicted allele frequencies were based on 1000 Genomes data, and were obtained from the HaploReg v4.1 database that is hosted by the Broad Institute and the Massachusetts Institute of Technology (<https://pubs.broadinstitute.org/mammals/haploreg/haploreg.php>).

| SNP                 | Self-Reported Race | Predicted Allele Frequency | Observed Allele Frequency |
|---------------------|--------------------|----------------------------|---------------------------|
| <i>CYP3A5*1</i>     | Black              | 0.81                       | 0.55                      |
|                     | White              | 0.05                       | 0.11                      |
| <i>CYP3A4*1b</i>    | Black              | 0.76                       | 0.66                      |
|                     | White              | 0.03                       | 0.05                      |
| <i>CYP3A4*22</i>    | Black              | N/A                        | N/A                       |
|                     | White              | 0.05                       | 0.03                      |
| <i>ABCB1</i> C1236T | Black              | 0.14                       | 0.16                      |
|                     | White              | 0.43                       | 0.44                      |
| <i>ABCB1</i> C2677T | Black              | 0.03                       | 0.06                      |
|                     | White              | 0.43                       | 0.42                      |
| <i>ABCB1</i> C3435T | Black              | 0.15                       | 0.19                      |
|                     | White              | 0.53                       | 0.53                      |

Abbreviations: *ABCB1*, ATP-binding cassette B1; *CYP3A4/5*, cytochrome P450 isoforms 4 and 5; SNP, single nucleotide polymorphism.

**Table S4.** Preliminary results for association between DDIs and median tacrolimus steady-state trough concentrations. Median steady-state tacrolimus concentration levels (ng/mL) were obtained for all patients on the day of allogeneic HSCT (Day 0). Associations between tacrolimus concentration and different risks of DDI were evaluated.  $p < 0.05$  was considered significant.

| DDI                          | <i>n</i> (%) | Median Trough<br>Concentration (ng/mL), Range | <i>p</i> -value |
|------------------------------|--------------|-----------------------------------------------|-----------------|
| No interaction               | 19 (7.5)     | 4.1 (1.4–14.1)                                | Reference       |
| Minimal risk of interaction  | 41 (16.3)    | 6.4 (1.1–20.3)                                | 0.24            |
| Moderate risk of interaction | 183 (72.6)   | 5.0 (0.6–27.1)                                | 0.79            |
| Severe risk of interaction   | 9 (3.6)      | 8.8 (2.1–16.2)                                | 0.11            |

Abbreviations: ABCB1, ATP-binding cassette B1; Adj, adjusted; CYP3A4/5, cytochrome P450 isoforms 4 and 5; DDI, drug-drug interaction.

**Table S5.** AKI occurrence for *CYP3A4/5* and *ABCB1* SNPs. Each *CYP3A4/5* variant are presented in table below with total of patients presenting AKI during the first 15 days post-allogeneic HSCT.  $p < 0.05$  was considered significant, and reported  $p$  values were adjusted for multiple comparisons using the Bonferroni method.

| SNP                                  | Genotype                       | AKI, $n$ | AKI, % | Unadjusted $p$ -value | Adjusted $p$ -value |
|--------------------------------------|--------------------------------|----------|--------|-----------------------|---------------------|
| <i>CYP3A5</i> *3<br>( $n = 252$ )    | *1/*1 or *1/*3 ( $n = 77$ )    | 6        | 7.80   | 0.58                  | > 0.99              |
|                                      | *3/*3 ( $n = 175$ )            | 10       | 5.71   |                       |                     |
| <i>CYP3A4</i> *1b<br>( $n = 247$ )   | *1/*1 ( $n = 200$ )            | 10       | 5.00   | 0.09                  | 0.54                |
|                                      | *1/*1b or *1b/*1b ( $n = 47$ ) | 6        | 12.77  |                       |                     |
| <i>CYP3A4</i> *22<br>( $n = 252$ )   | *1/*1 ( $n = 241$ )            | 16       | 6.63   | > 0.99                | > 0.99              |
|                                      | *1/*22 or *22/*22 ( $n = 11$ ) | 0        | 0.00   |                       |                     |
| <i>ABCB1</i> C1236T<br>( $n = 224$ ) | CC ( $n = 73$ )                | 6        | 8.2    | 0.54                  | > 0.99              |
|                                      | CT ( $n = 116$ )               | 7        | 6.0    |                       |                     |
|                                      | TT ( $n = 35$ )                | 1        | 2.9    |                       |                     |
| <i>ABCB1</i> C2677T<br>( $n = 187$ ) | CC ( $n = 82$ )                | 9        | 11.0   | 0.16                  | 0.96                |
|                                      | CT ( $n = 71$ )                | 3        | 4.2    |                       |                     |
|                                      | TT ( $n = 34$ )                | 1        | 2.9    |                       |                     |
| <i>ABCB1</i> C3435T<br>( $n = 222$ ) | CC ( $n = 56$ )                | 4        | 7.1    | 0.96                  | > 0.99              |
|                                      | CT ( $n = 116$ )               | 7        | 6.0    |                       |                     |
|                                      | TT ( $n = 50$ )                | 3        | 6.0    |                       |                     |

Abbreviations: *ABCB1*, ATP-binding cassette B1; AKI, acute kidney injury; *CYP3A4/5*, cytochrome P450 isoforms 4 and 5; SNP, single nucleotide polymorphism.

**Table S6.** Cumulative incidence of aGVHD by *CYP3A4/5* and *ABCB1*. Cumulative incidence of aGVHD occurrence, regardless of organ type, are presented below. Results are stratified by *CYP3A4/5* and *ABCB1*, and grouped by all-grade, grade 2+, and grade 3+ aGVHD.  $p < 0.05$  was considered significant.

| aGVHD                                     |                           |                 |                          |                 |                          |                 |
|-------------------------------------------|---------------------------|-----------------|--------------------------|-----------------|--------------------------|-----------------|
| Genotype                                  | All Grade<br><i>n</i> (%) | <i>p</i> -value | Grade 2+<br><i>n</i> (%) | <i>p</i> -value | Grade 3+<br><i>n</i> (%) | <i>p</i> -value |
| <b><i>CYP3A5*3</i> (n=252)</b>            |                           |                 |                          |                 |                          |                 |
| <i>*1/*1</i> ( <i>n</i> = 13)             | 4 (30.8)                  |                 | 0 (0)                    |                 | 0 (0)                    |                 |
| <i>*1/*3</i> ( <i>n</i> = 64)             | 27 (42.2)                 | > 0.99          | 11 (17.2)                | > 0.99          | 2 (3.1)                  | > 0.99          |
| <i>*3/*3</i> ( <i>n</i> = 175)            | 70 (40.0)                 |                 | 24 (13.7)                |                 | 6 (3.4)                  |                 |
| <b><i>CYP3A4*1b</i> (n=247)</b>           |                           |                 |                          |                 |                          |                 |
| <i>*1/*1</i> ( <i>n</i> = 200)            | 85 (42.5)                 |                 | 28 (14)                  |                 | 7 (3.5)                  |                 |
| <i>*1/*1b</i> ( <i>n</i> = 33)            | 11 (33.3)                 | > 0.99          | 4 (12.1)                 | > 0.99          | 1 (3.0)                  | > 0.99          |
| <i>*1b/*1b</i> ( <i>n</i> = 14)           | 3 (21.4)                  |                 | 1 (7.1)                  |                 | 0 (0)                    |                 |
| <b><i>CYP3A4*22</i> (n=252)</b>           |                           |                 |                          |                 |                          |                 |
| <i>*1/*1</i> ( <i>n</i> = 241)            | 99 (41.1)                 |                 | 34 (14.1)                |                 | 8 (3.3)                  |                 |
| <i>*1/*22 or *22/*22</i> ( <i>n</i> = 11) | 2 (18.2)                  | > 0.99          | 0 (0)                    | > 0.99          | 0 (0)                    | > 0.99          |
| <b><i>ABCB1 C1236T</i> (n=224)</b>        |                           |                 |                          |                 |                          |                 |
| <i>C/C</i> ( <i>n</i> = 73)               | 38 (52.1)                 |                 | 13 (17.8)                |                 | 0 (0)                    |                 |
| <i>C/T</i> ( <i>n</i> = 116)              | 42 (36.2)                 | 0.54            | 13 (11.2)                | > 0.99          | 4 (3.4)                  | 0.30            |
| <i>T/T</i> ( <i>n</i> = 35)               | 15 (42.9)                 |                 | 7 (20.0)                 |                 | 3 (8.6)                  |                 |
| <b><i>ABCB1 C2677T</i> (n=187)</b>        |                           |                 |                          |                 |                          |                 |
| <i>C/C</i> ( <i>n</i> = 82)               | 40 (48.8)                 |                 | 12 (14.6)                |                 | 2 (2.4)                  |                 |
| <i>C/T</i> ( <i>n</i> = 71)               | 29 (40.8)                 | > 0.99          | 9 (12.7)                 | > 0.99          | 3 (4.2)                  | > 0.99          |
| <i>T/T</i> ( <i>n</i> = 34)               | 14 (41.2)                 |                 | 5 (14.7)                 |                 | 1 (2.9)                  |                 |
| <b><i>ABCB1 C3435T</i> (n=222)</b>        |                           |                 |                          |                 |                          |                 |
| <i>C/C</i> ( <i>n</i> = 56)               | 27 (48.2)                 |                 | 10 (17.9)                |                 | 1 (1.8)                  |                 |
| <i>C/T</i> ( <i>n</i> = 116)              | 46 (39.7)                 | > 0.99          | 15 (12.9)                | > 0.99          | 4 (3.4)                  | > 0.99          |
| <i>T/T</i> ( <i>n</i> = 50)               | 21 (42.0)                 |                 | 7 (14.0)                 |                 | 2 (4.0)                  |                 |

Abbreviations: *ABCB1*, ATP-binding cassette B1; aGVHD, acute graft-versus host disease; *CYP3A4/5*, cytochrome P450 isoforms 4 and 5.

## Supplementary Figure

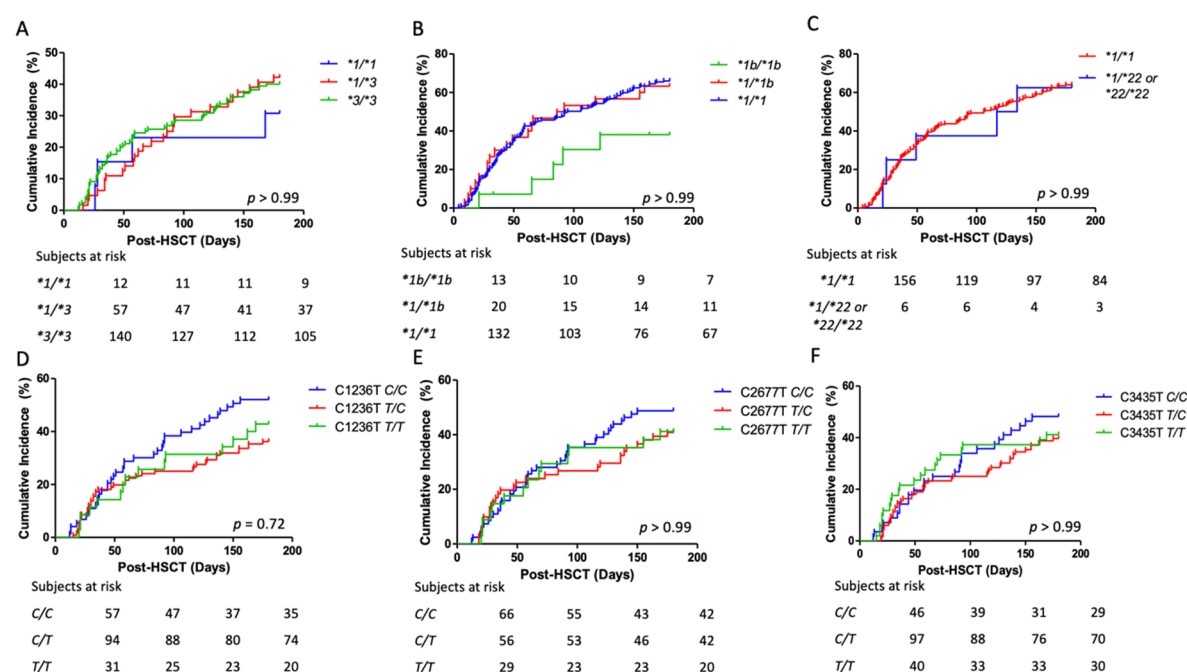

**Figure S1.** Cumulative incidence of aGVHD by *CYP3A4/5* and *ABCB1* genotypes. Cumulative incidence of all-grade aGVHD by each SNP is shown using Kaplan Meier curves where the y-axis denotes cumulative incidence of patients experiencing aGVHD, while the x-axis denotes days post-transplant. Subjects at risk on days +50, +100, +150, and +200 post-allogeneic HSCT are shown. *CYP3A5*\*3 (A), *CYP3A4*\*1b (B), *CYP3A4*\*22 (C), *ABCB1* C1236T (D), *ABCB1* C2677T (E), and *ABCB1* C3435T (F) were evaluated for time to aGVHD occurrence.  $p < 0.05$  was considered significant, and reported  $p$  values were adjusted for multiple comparisons using the Bonferroni method. Abbreviations: *ABCB1*, ATP-binding cassette B1; aGVHD, acute graft-versus host disease; *CYP3A4/5*, cytochrome P450 isoforms 4 and 5; HSCT, hematopoietic stem cell transplant.
